# Supplementary material for: Manganese-oxide-supported gold catalyst derived from metal–organic frameworks for trace PCl 3 oxidation in an organic system
Source: Royal Society of Chemistry journal article supplement (doi:10.1039/d3ra08566j), 2024-01-01
Supplement: d3ra08566j1.pdf [file d3ra08566j1.pdf]

## **Supporting Information**

### **Manganese oxide supported gold catalyst derived from metal organic frameworks for trace $\text{PCl}_3$ oxidation in organic system**

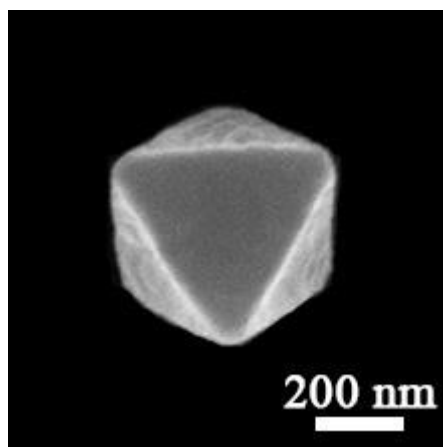

Fig. S1 SEM images of MIL-100 (Mn).

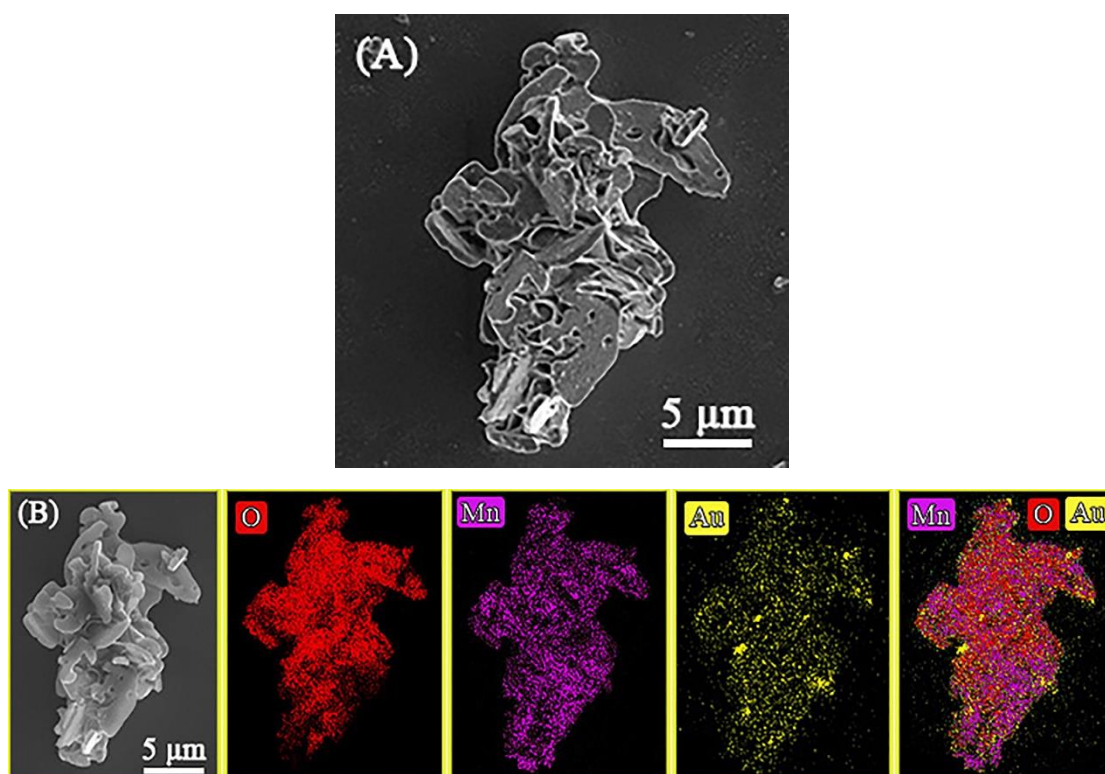

Fig. S2 (A) SEM images, (B) element distribution of O, Mn and Au species over SEM-EDX of Au-Mn<sub>3</sub>O<sub>4</sub>.
